# Supplementary material
Source: publisher figshare collection journal article supplement (https://karger.figshare.com/ndownloader/files/24152825)
Supplement: Supplementary file 1 [file 24152825]

**Supplemental material ; A flow diagram for this study**

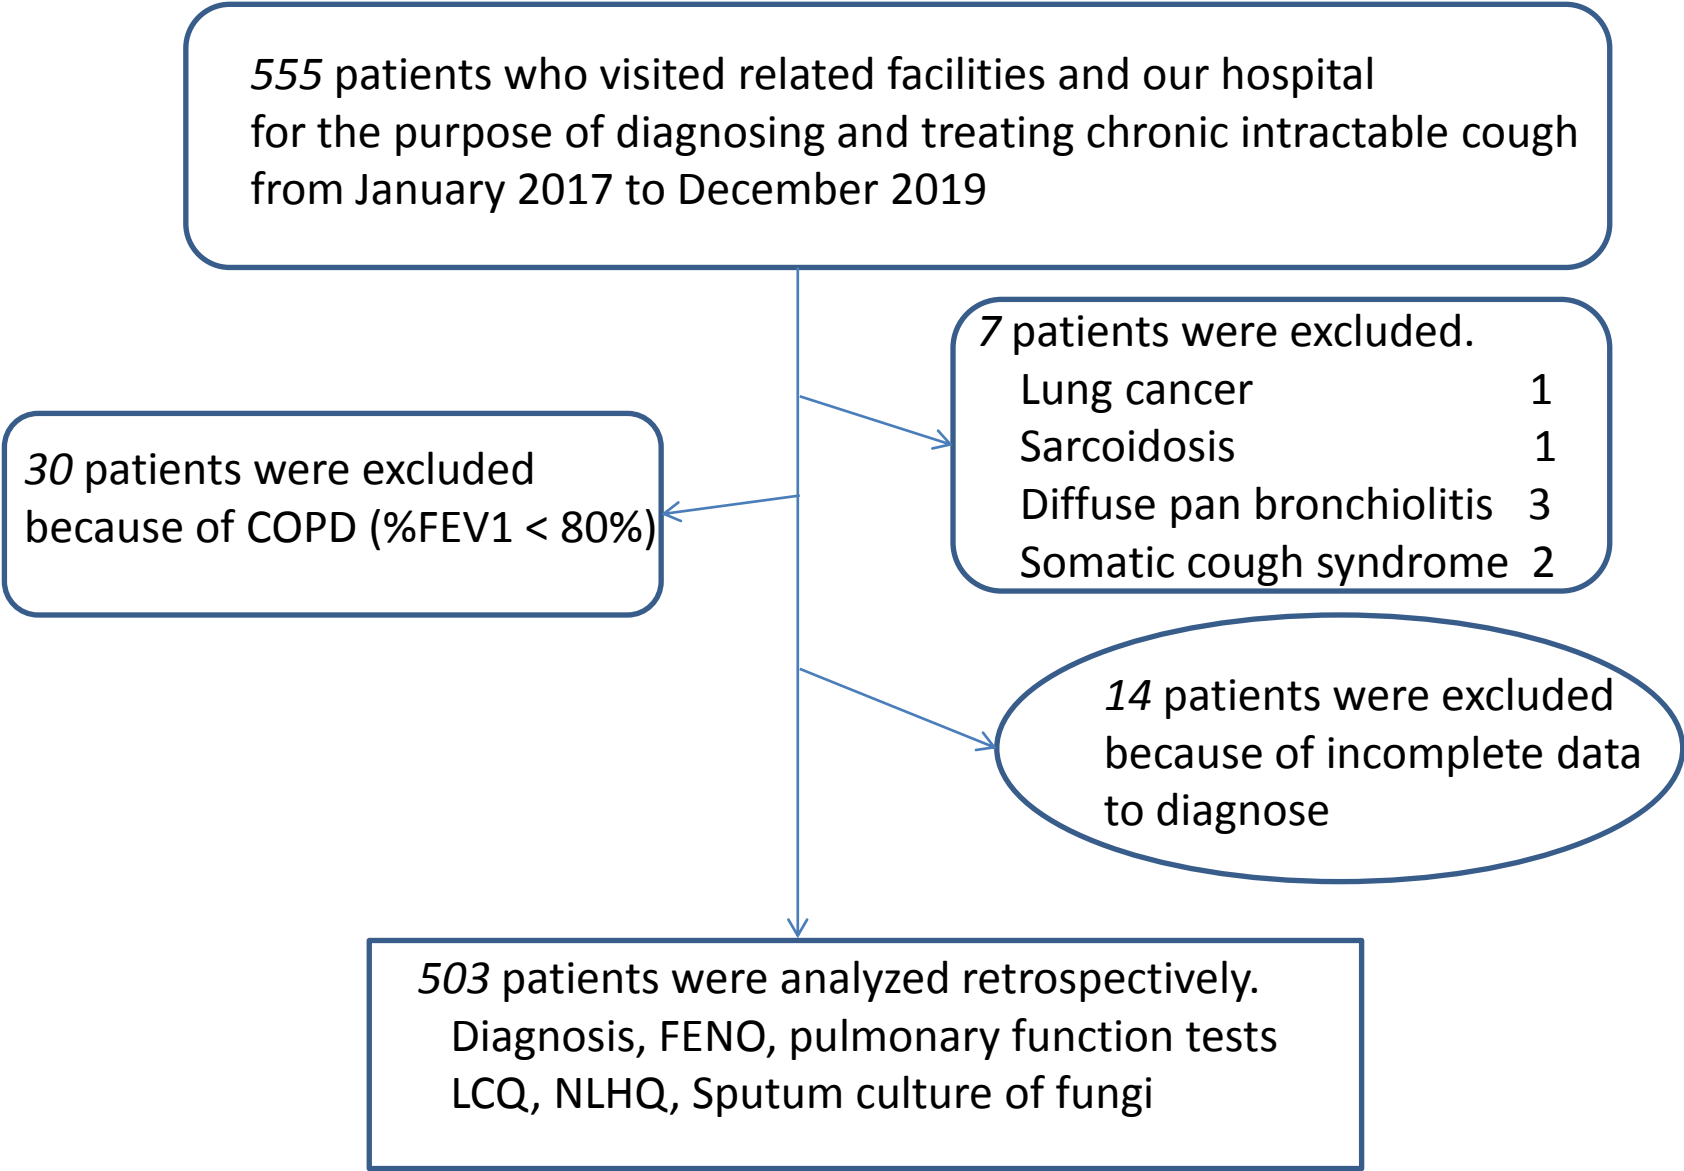

Of 555 patients visiting related facilities and our hospital for diagnosis and treatment of chronic intractable cough between January 2017 and December 2019, 51 patients were excluded and retrospective analysis was performed in 503 patients.
